# Supplementary material for: Enhanced bifunctional electrocatalytic activities of hybrid Co(OH)2/MOF-derived materials for green hydrogen production by electrochemical water splitting
Source: Royal Society of Chemistry journal article supplement (doi:10.1039/d3se01632c), 2024-01-01
Supplement: d3se01632c1.pdf [file d3se01632c1.pdf]

Electronic supplementary information

## Enhanced bifunctional electrocatalytic activities of hybrid $\text{Co(OH)}_2/\text{MOF}$ -derived materials for green hydrogen production by electrochemical water splitting

Apurba Borah,<sup>a</sup> Sumit,<sup>a</sup> Sathishkumar Palaniyappan,<sup>b</sup> and Rajeshkhanna Gaddam<sup>a\*</sup>

<sup>a</sup>Department of Chemistry, National Institute of Technology Warangal, Hanumakonda-506004, India.

<sup>b</sup>Department of Physics, Centre for Functional Materials, School of Advanced Sciences, Vellore Institute of Technology, Vellore-632014, India.

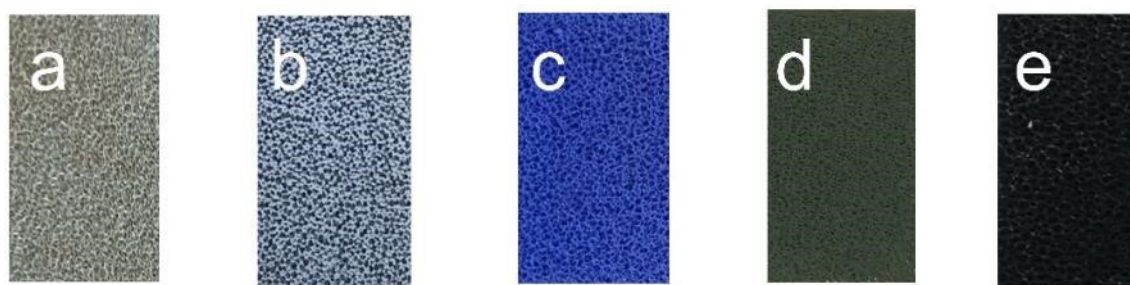

**Fig. S1** Digital images of (a) bare NF, (b)  $\text{Co(OH)}_2@\text{NF}$ , (c)  $\text{Co(OH)}_2/\text{ZIF-67}@\text{NF}$ , (d)  $\text{Co}_3\text{O}_4@\text{NF}$ , (e)  $\text{Co}_3\text{S}_4@\text{NF}$ .

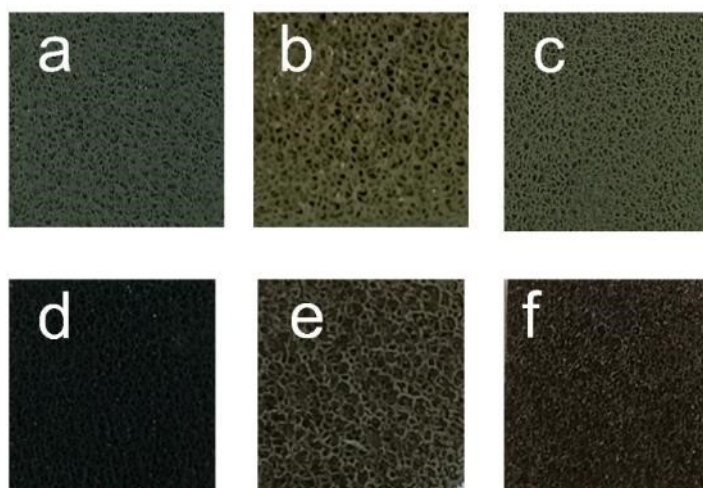

**Fig. S2** Digital images of (a)  $\text{Co}_3\text{O}_4@\text{NF}$  before electrochemical studies, (b)  $\text{Co}_3\text{O}_4@\text{NF}$  after OER studies, (c)  $\text{Co}_3\text{O}_4@\text{NF}$  after HER studies @NF, (d)  $\text{Co}_3\text{S}_4@\text{NF}$  before electrochemical studies, (e)  $\text{Co}_3\text{S}_4@\text{NF}$  after OER studies, and (f)  $\text{Co}_3\text{S}_4@\text{NF}$  after HER studies, (All are of  $1 \text{ cm}^{-2}$  area).

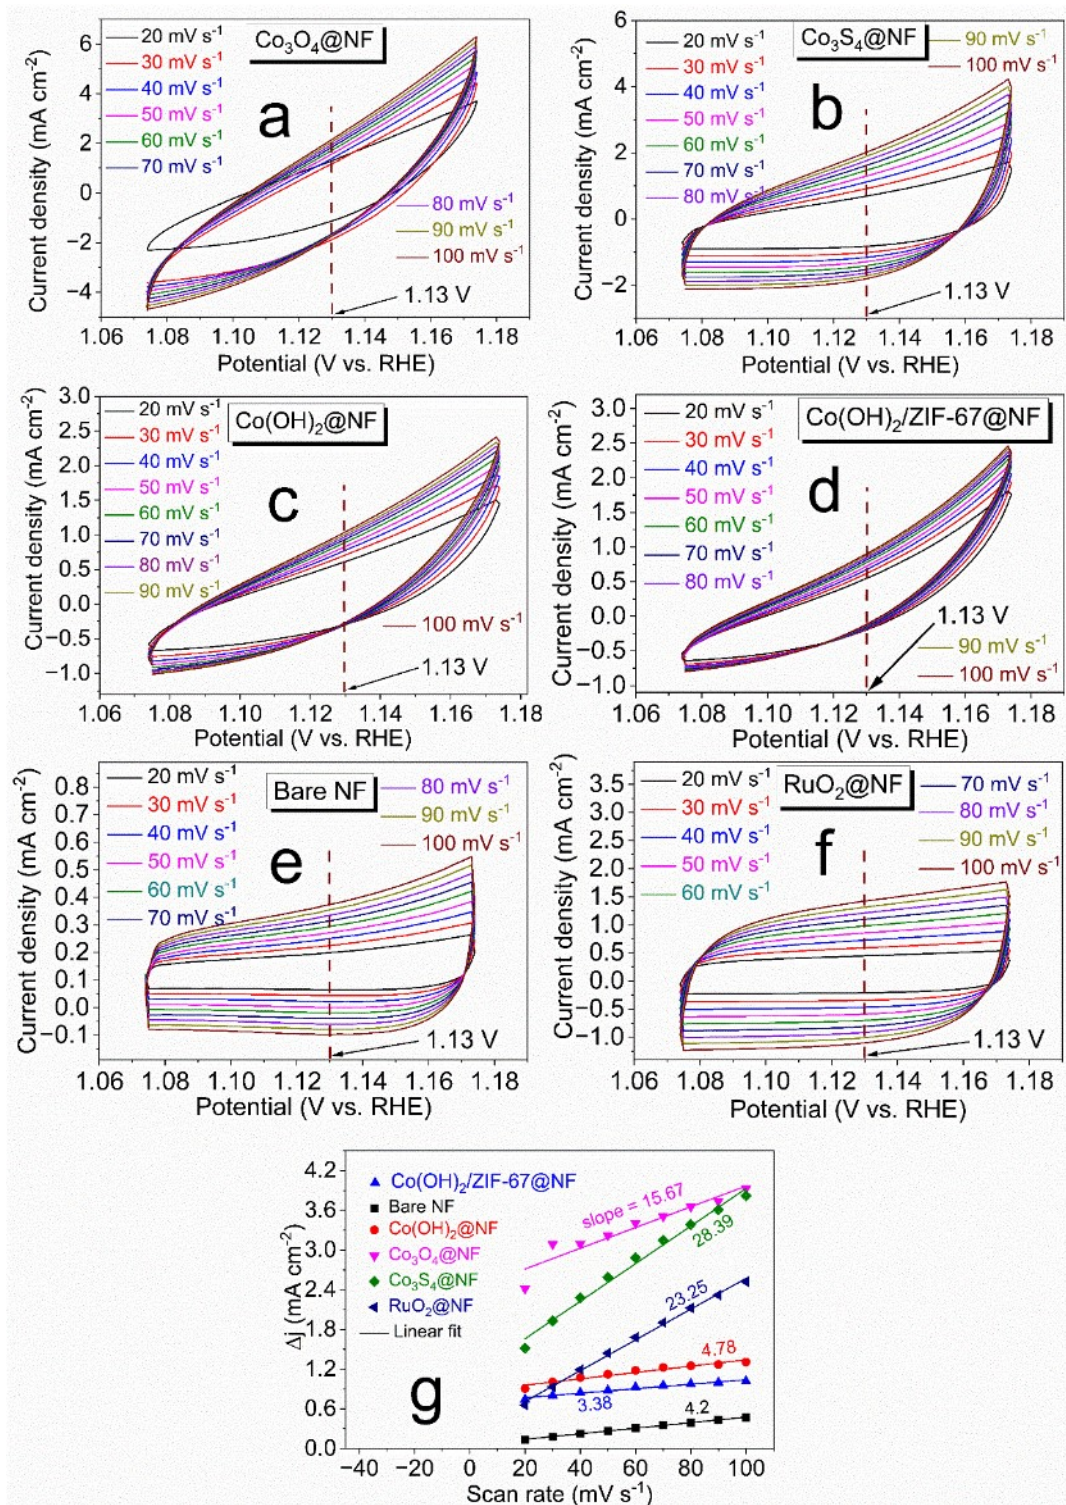

**Fig. S3** Cyclic voltammograms of (a) Co<sub>3</sub>O<sub>4</sub>@NF, (b) Co<sub>3</sub>S<sub>4</sub>@NF, (c) Co(OH)<sub>2</sub>@NF, (d) Co(OH)<sub>2</sub>/ZIF-67@NF, (e) Bare NF, (f) RuO<sub>2</sub>@NF at different scan rates ranging from 20 to 100 mV s<sup>-1</sup>, (g) Scan rate dependent current densities of all the materials at 1.13 V (vs. RHE).

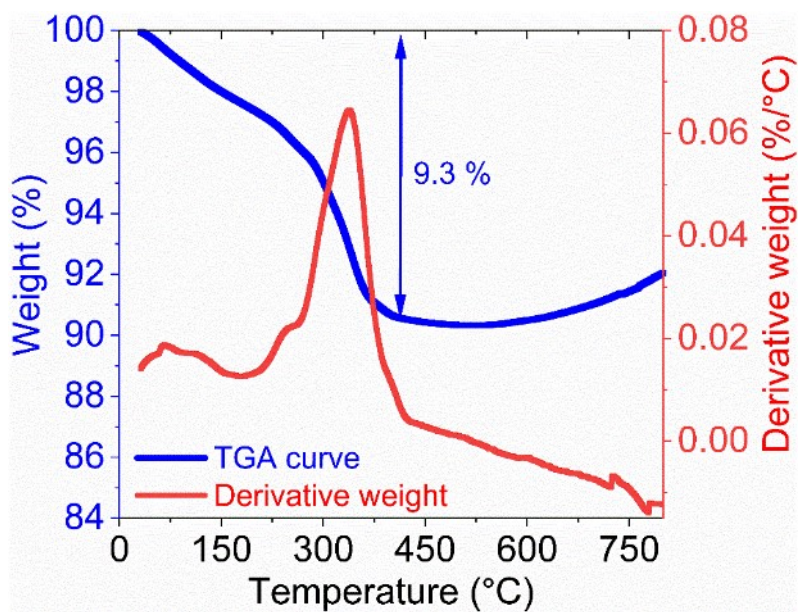

**Fig. S4** TGA curve of  $\text{Co(OH)}_2/\text{ZIF-67@NF}$  in the presence of air.

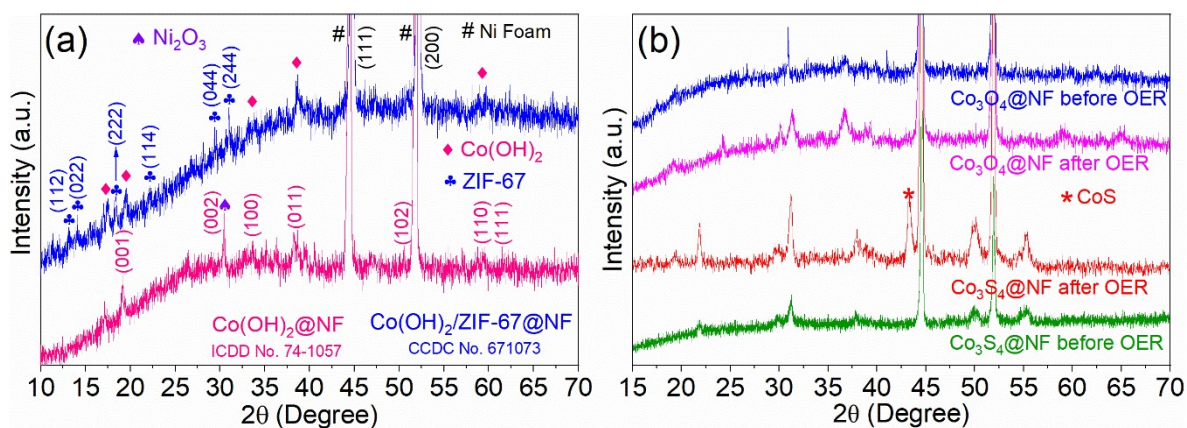

**Fig. S5** PXRD patterns of (a)  $\text{Co(OH)}_2@NF$ ,  $\text{Co(OH)}_2/\text{ZIF-67@NF}$ , and (b)  $\text{Co}_3\text{O}_4@NF$  and  $\text{Co}_3\text{S}_4@NF$  before and after OER studies.

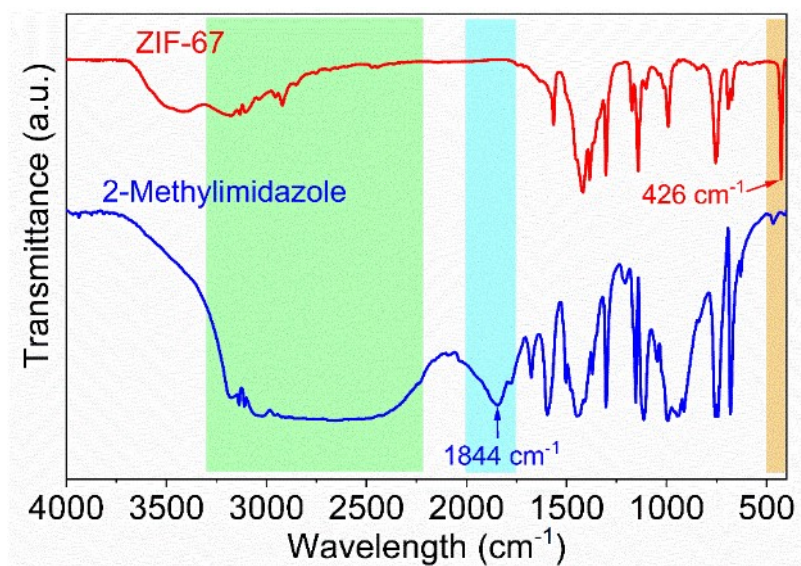

**Fig. S6** FT-IR spectrum of ZIF-67 and 2-methylimidazole.

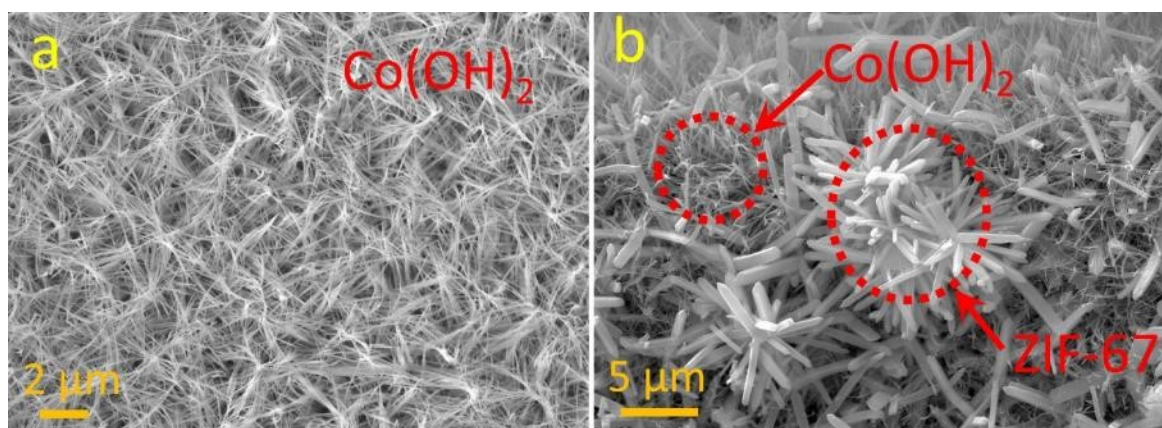

**Fig. S7** The FE-SEM images of (a)  $\text{Co(OH)}_2@NF$ , and (b)  $\text{Co(OH)}_2/\text{ZIF-67}@NF$ .

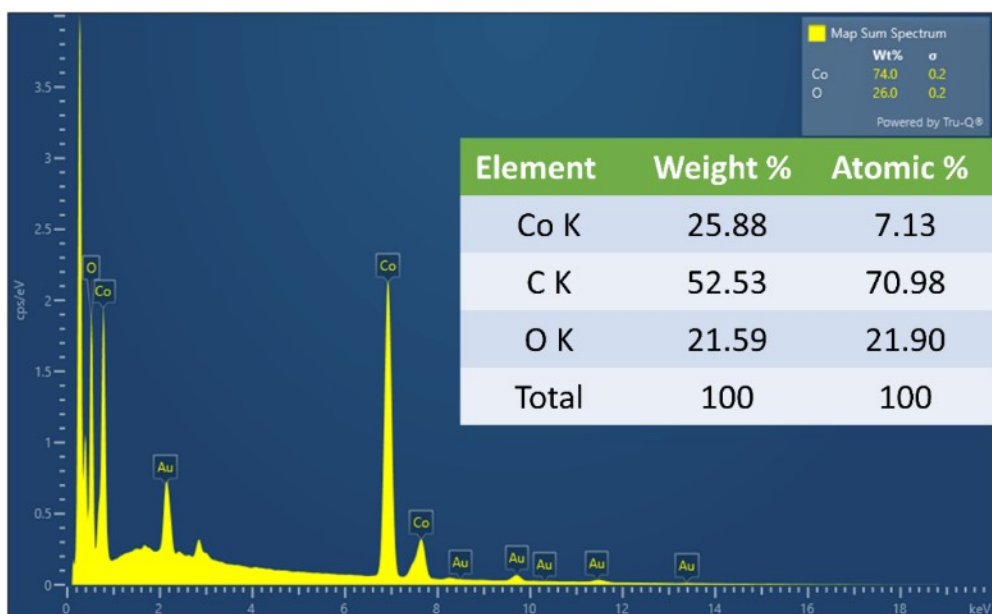

Fig. S8 EDX spectrum of  $\text{Co}_3\text{O}_4@\text{NF}$ .

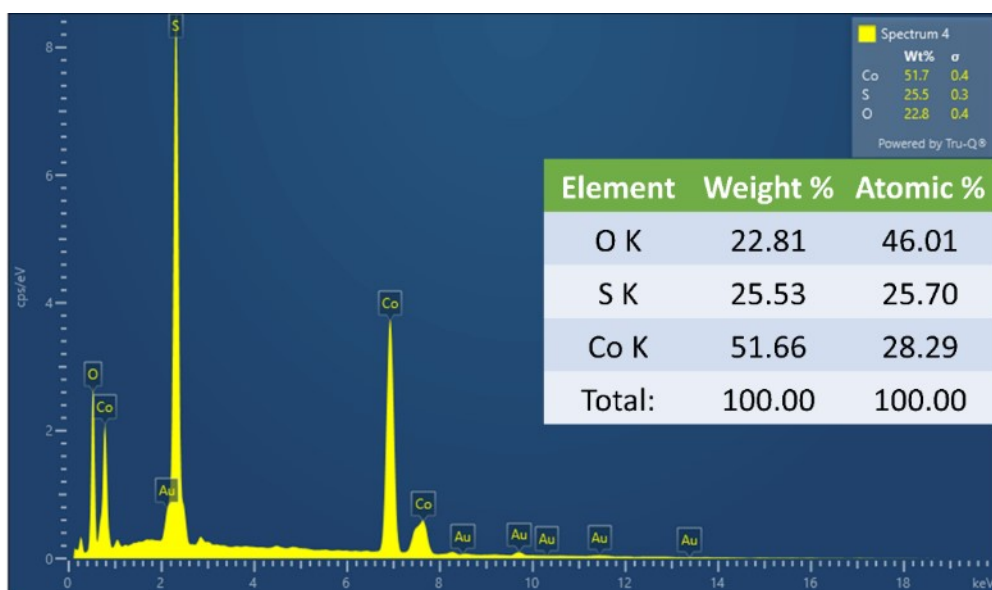

Fig. S9 EDX spectrum of  $\text{Co}_3\text{S}_4@\text{NF}$ .

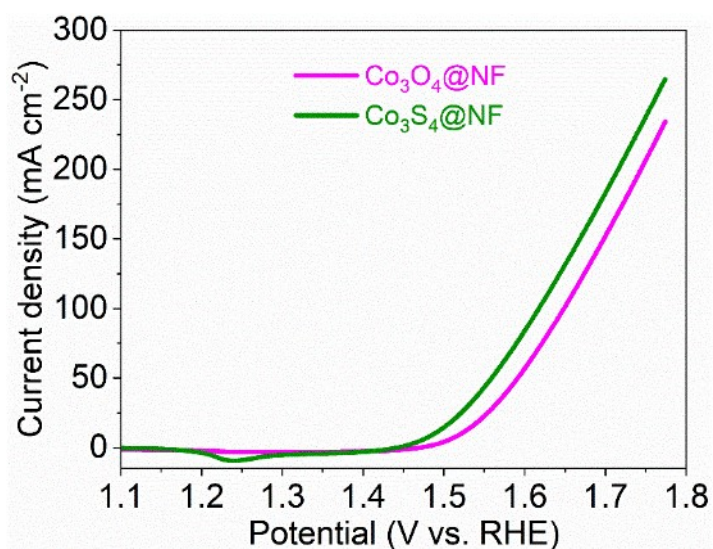

**Fig. S10** LSV curves obtained by reverse scanning at a scan rate of  $2 \text{ mV s}^{-1}$ .

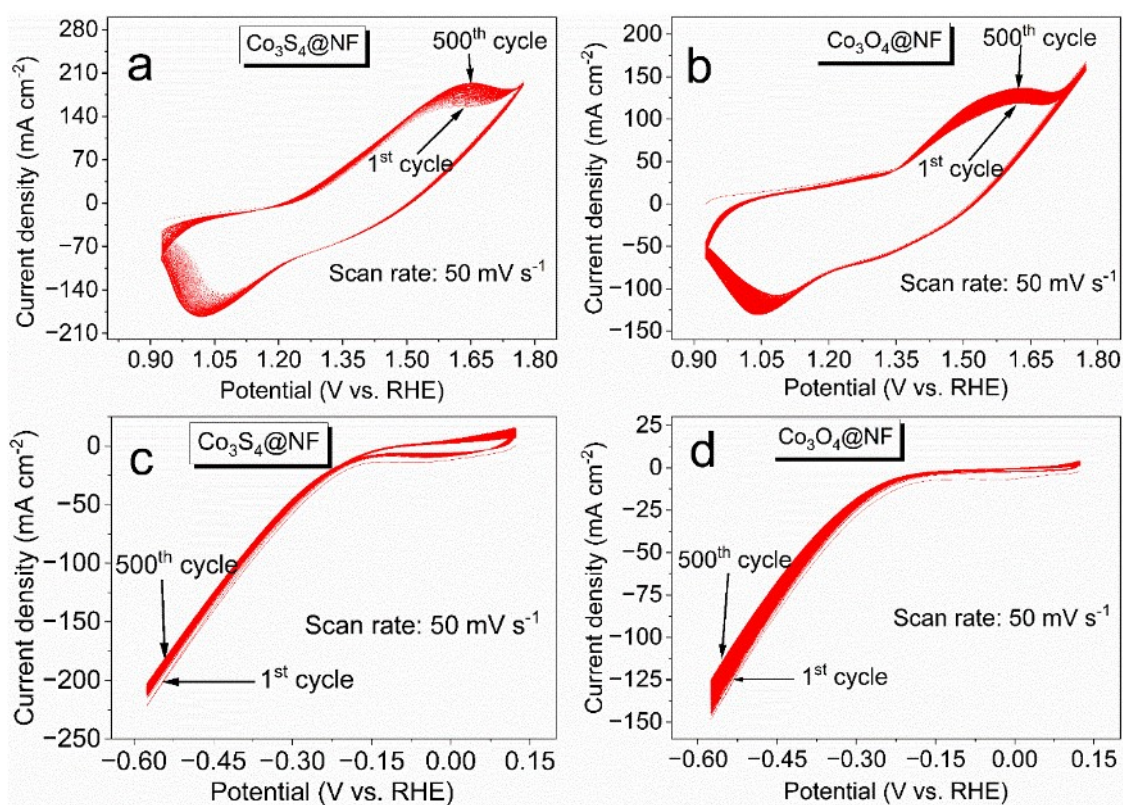

**Fig. S11** Cyclic voltammograms of (a)  $\text{Co}_3\text{S}_4@\text{NF}$  in OER region, (b)  $\text{Co}_3\text{O}_4@\text{NF}$  in OER region, (c)  $\text{Co}_3\text{S}_4@\text{NF}$  in HER region, (d)  $\text{Co}_3\text{O}_4@\text{NF}$  in HER region for 500 cycles at a scan rate of  $50 \text{ mV s}^{-1}$ .

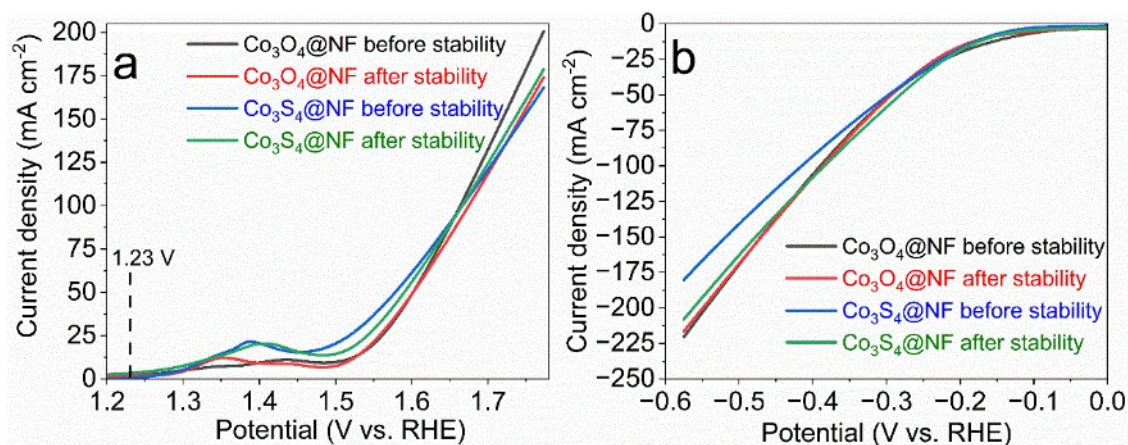

**Fig. S12** LSV curves of  $\text{Co}_3\text{O}_4@\text{NF}$  and  $\text{Co}_3\text{S}_4@\text{NF}$  before and after stability for (a) OER, (b) HER at a scan rate of  $2 \text{ mV s}^{-1}$ .

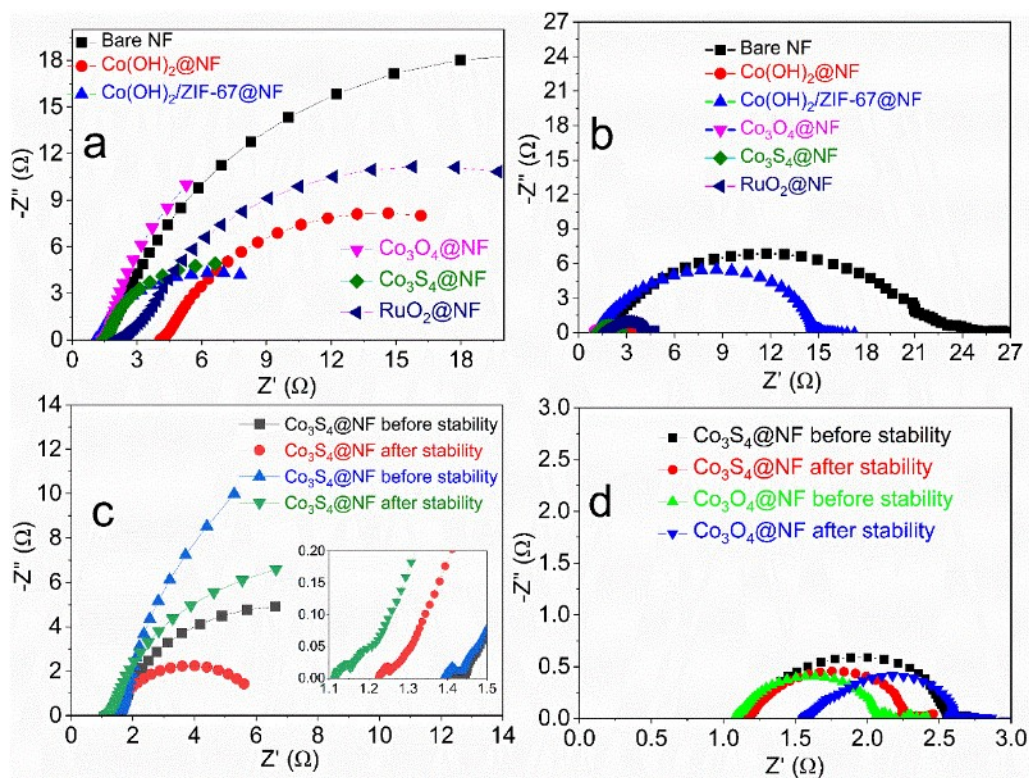

**Fig. S13** Nyquist plots of synthesized materials (a) in OER region at  $1.47 \text{ V}$  (vs. RHE) before stability, (b) in HER region at  $-0.276 \text{ V}$  (vs. RHE) before stability, (c) before and after stability in OER region at  $1.47 \text{ V}$  (vs. RHE), and (d) before and after stability in HER region at  $-0.276 \text{ V}$  (vs. RHE).



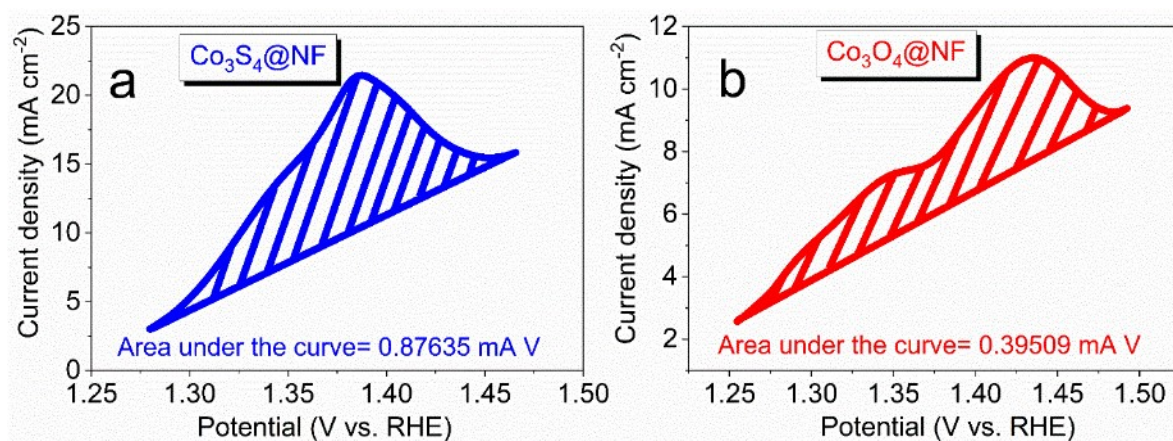

**Fig. S14** Area under the oxidation peak of (a)  $\text{Co}_3\text{O}_4@\text{NF}$ , and (b)  $\text{Co}_3\text{S}_4@\text{NF}$  of the LSV curves at scan rate of  $2 \text{ mV s}^{-1}$ .

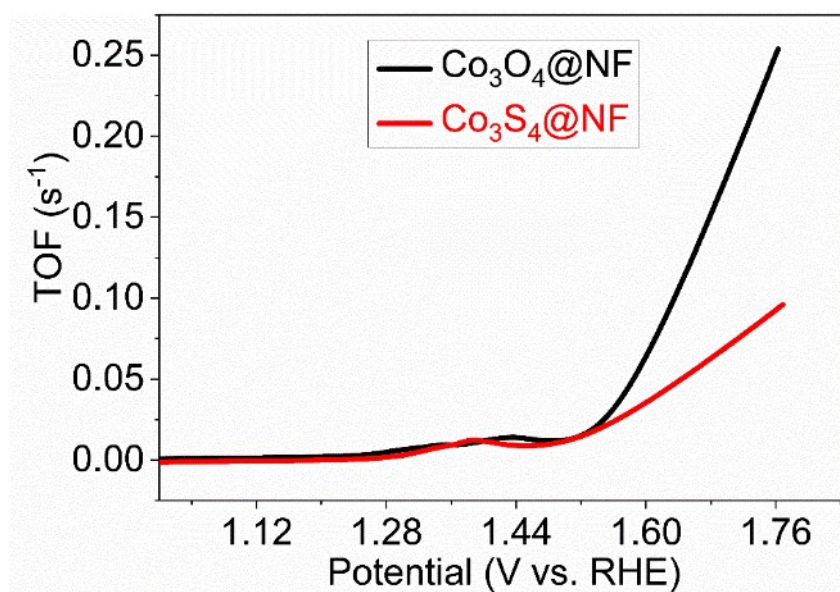

**Fig. S15** The corresponding calculated TOF curves of the investigated catalysts.

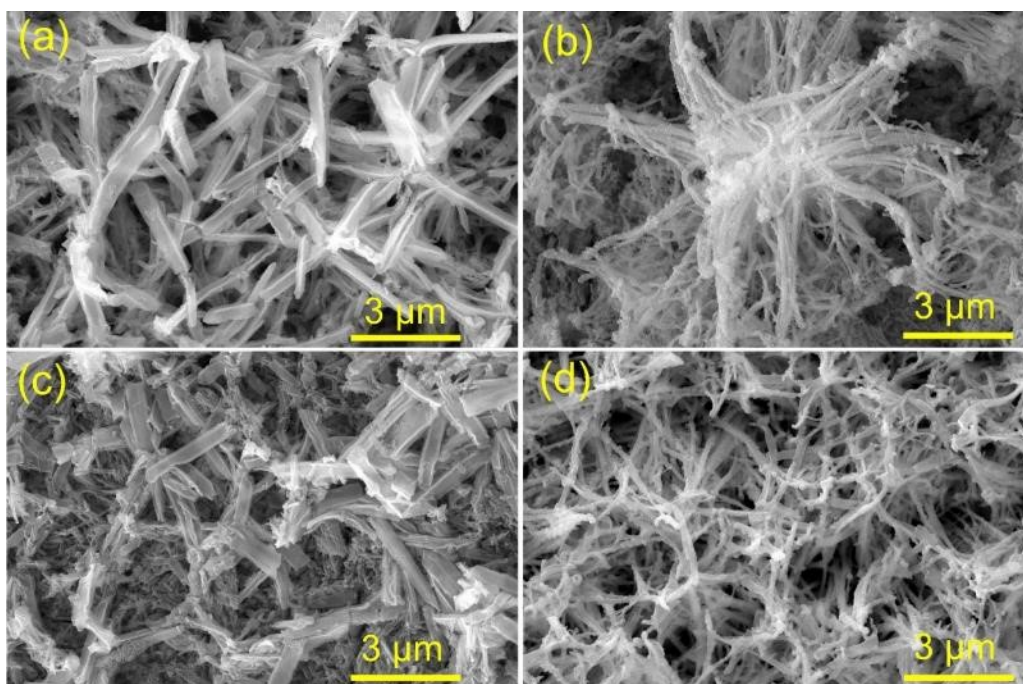

**Fig. S16** The FE-SEM images of (a) Co<sub>3</sub>O<sub>4</sub>@NF after OER studies, (b) Co<sub>3</sub>S<sub>4</sub>@NF after OER studies, (c) Co<sub>3</sub>O<sub>4</sub>@NF after HER studies, and (d) Co<sub>3</sub>S<sub>4</sub>@NF after HER studies.

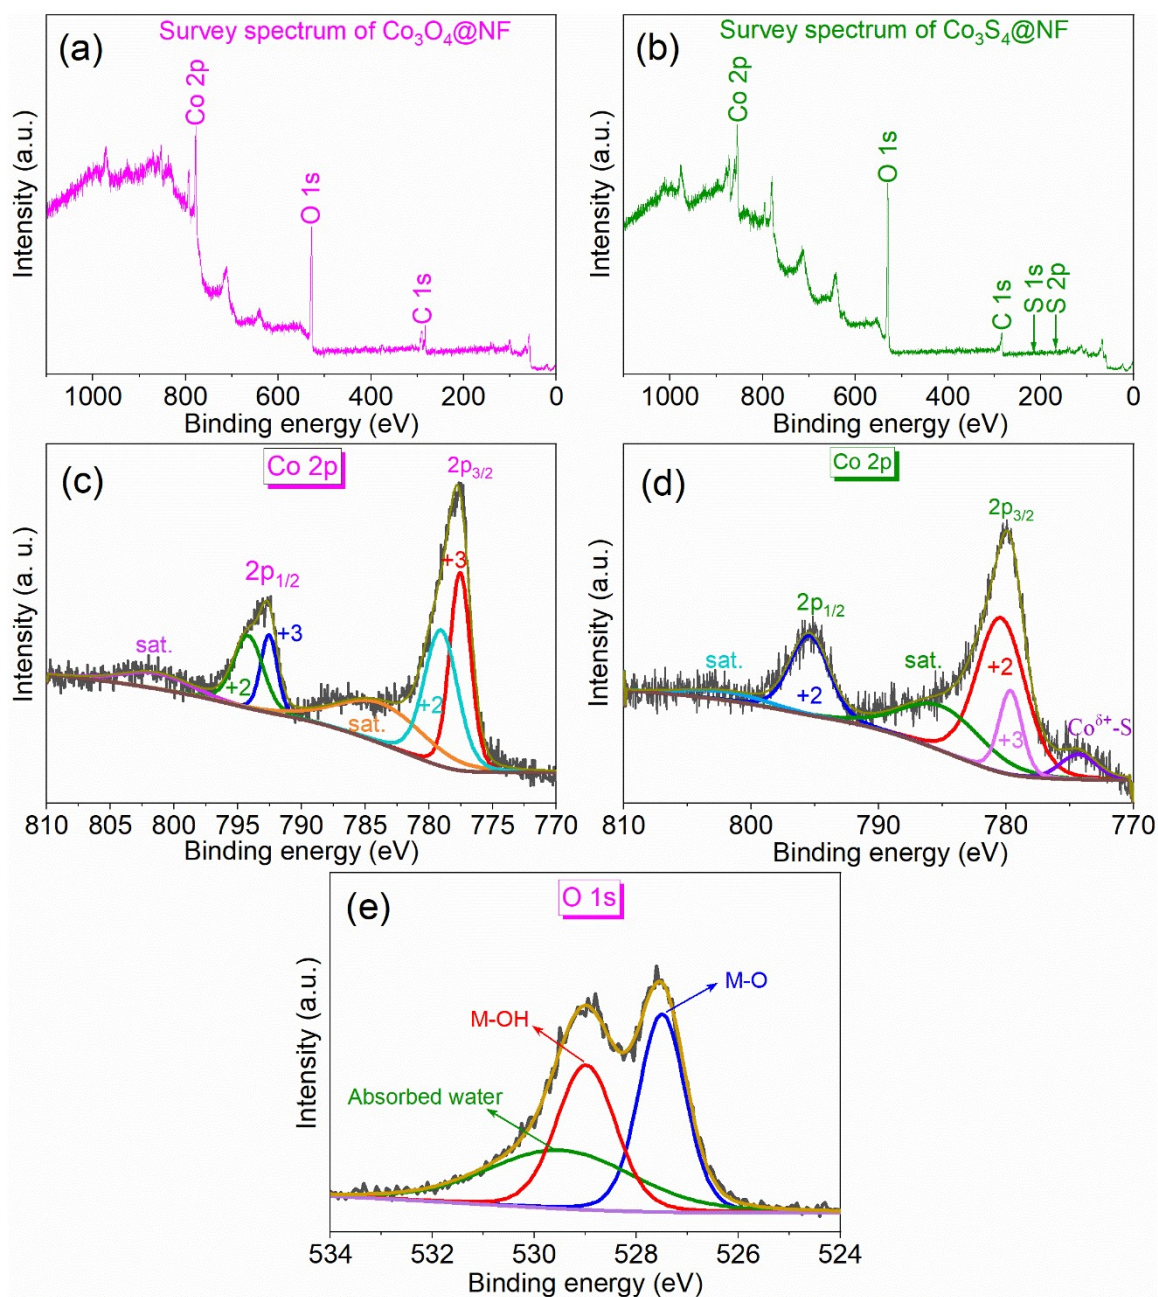

**Fig. S17** XPS survey spectra after OER studies of (a)  $\text{Co}_3\text{O}_4@\text{NF}$ , (b)  $\text{Co}_3\text{S}_4@\text{NF}$ , and deconvoluted spectra for Co 2p of (c)  $\text{Co}_3\text{O}_4@\text{NF}$ , (d)  $\text{Co}_3\text{S}_4@\text{NF}$ , and (e) O 1s of  $\text{Co}_3\text{O}_4@\text{NF}$ .

**Table S1.** Tafel slope, overpotentials at current densities of 10 mA cm<sup>-2</sup> and 20 mA cm<sup>-2</sup> of the synthesized electrocatalysts for OER.

| Electrocatalyst                    | Tafel slope<br>(mV dec <sup>-1</sup> ) | $\eta@10 \text{ mA cm}^{-2}$<br>(mV) | $\eta@20 \text{ mA cm}^{-2}$<br>(mV) | Electrolyte |
|------------------------------------|----------------------------------------|--------------------------------------|--------------------------------------|-------------|
| Bare NF                            | 223                                    | 344                                  | 377                                  | 1 M KOH     |
| Co(OH) <sub>2</sub> @NF            | 215                                    | 293                                  | 334                                  | 1 M KOH     |
| Co(OH) <sub>2</sub> /ZIF-67@NF     | 173                                    | 265                                  | 304                                  | 1 M KOH     |
| Co <sub>3</sub> O <sub>4</sub> @NF | 132                                    | 270                                  | 318                                  | 1 M KOH     |
| Co <sub>3</sub> S <sub>4</sub> @NF | 189                                    | -                                    | 260                                  | 1 M KOH     |
| RuO <sub>2</sub> @NF               | 182                                    | 317                                  | 359                                  | 1 M KOH     |

**Calculation of exchange current density ( $j_0$ ) from EIS:**

For Co<sub>3</sub>O<sub>4</sub>@NF before stability for OER-

$$j_0 = \frac{(8.314 \text{ J K}^{-1} \text{ mol}^{-1} \times 298 \text{ K})}{(4 \times 96485 \text{ C mol}^{-1} \times 1.452 \Omega \times 1 \text{ cm}^2)}$$

$$j_0 = 4.42 \text{ mA cm}^{-2}$$

For Co<sub>3</sub>O<sub>4</sub>@NF before stability for HER-

$$j_0 = \frac{(8.314 \text{ J K}^{-1} \text{ mol}^{-1} \times 298 \text{ K})}{(2 \times 96485 \text{ C mol}^{-1} \times 1.452 \Omega \times 1 \text{ cm}^2)}$$

$$j_0 = 3.69 \text{ mA cm}^{-2}$$

Similarly, all  $j_0$  values are calculated following above calculation process, and presented in the **Table S2**.

**Table S2.** Exchange current density ( $j_0$ ) from EIS data.

| <b>Electrocatalyst</b>                              | <b><math>j_0</math> for OER<br/>(mA cm<sup>-2</sup>)</b> | <b><math>j_0</math> for HER<br/>(mA cm<sup>-2</sup>)</b> |
|-----------------------------------------------------|----------------------------------------------------------|----------------------------------------------------------|
| Co <sub>3</sub> O <sub>4</sub> @NF before stability | 4.42                                                     | 3.69                                                     |
| Co <sub>3</sub> O <sub>4</sub> @NF after stability  | 5.52                                                     | 4.95                                                     |
| Co <sub>3</sub> S <sub>4</sub> @NF before stability | 4.45                                                     | 4.99                                                     |
| Co <sub>3</sub> S <sub>4</sub> @NF after stability  | 5.13                                                     | 5.76                                                     |
| Co(OH) <sub>2</sub> @NF                             | 1.563                                                    | 3.9                                                      |
| Co(OH) <sub>2</sub> /ZIF-67@NF                      | 5.825                                                    | 0.878                                                    |

**Table S3.** Nyquist plot data of synthesised materials in OER region at 1.47 V (vs. RHE) potential.

| <b>Electrocatalyst</b>                              | <b><math>R_s</math> (<math>\Omega</math>)</b> | <b><math>R_{ct}</math> (<math>\Omega</math>)</b> | <b><math>R_T</math> (<math>\Omega</math>)</b> |
|-----------------------------------------------------|-----------------------------------------------|--------------------------------------------------|-----------------------------------------------|
| Co <sub>3</sub> O <sub>4</sub> @NF before stability | 1.390                                         | 0.062                                            | 1.452                                         |
| Co <sub>3</sub> O <sub>4</sub> @NF after stability  | 1.115                                         | 0.047                                            | 1.162                                         |
| Co <sub>3</sub> S <sub>4</sub> @NF before stability | 1.414                                         | 0.028                                            | 1.442                                         |
| Co <sub>3</sub> S <sub>4</sub> @NF after stability  | 1.225                                         | 0.027                                            | 1.252                                         |

|                                |        |        |       |
|--------------------------------|--------|--------|-------|
| Co(OH) <sub>2</sub> @NF        | 4.0741 | 0.0319 | 4.106 |
| Co(OH) <sub>2</sub> /ZIF-67@NF | 1.0859 | 0.0161 | 1.102 |

**Table S4.** Overpotential of synthesized materials before and after stability test for OER.

| Electrocatalyst                                     | j (10 mA cm <sup>-2</sup> ) | j (20 mA cm <sup>-2</sup> ) | Ref.      |
|-----------------------------------------------------|-----------------------------|-----------------------------|-----------|
| Co <sub>3</sub> O <sub>4</sub> @NF before stability | 270                         | 318                         | This work |
| Co <sub>3</sub> O <sub>4</sub> @NF after stability  | 280                         | 315                         | This work |
| Co <sub>3</sub> S <sub>4</sub> @NF before stability | -                           | 260                         | This work |
| Co <sub>3</sub> S <sub>4</sub> @NF after stability  | 253                         | 292                         | This work |

**Table S5.** Overpotential of synthesized materials before and after stability test for HER.

| Electrocatalyst                                     | j (-10 mA cm <sup>-2</sup> ) | j (-20 mA cm <sup>-2</sup> ) | Ref.      |
|-----------------------------------------------------|------------------------------|------------------------------|-----------|
| Co <sub>3</sub> O <sub>4</sub> @NF before stability | 124                          | 178                          | This work |
| Co <sub>3</sub> O <sub>4</sub> @NF after stability  | 154                          | 195                          | This work |
| Co <sub>3</sub> S <sub>4</sub> @NF before stability | 152                          | 180                          | This work |
| Co <sub>3</sub> S <sub>4</sub> @NF after stability  | 149                          | 181                          | This work |

**Table S6.** Double layer capacitance ( $C_{dl}$ ), electrochemically active surface area (ECSA) and roughness factor (RF) values of different synthesised electrocatalysts.

| Electrocatalyst                    | Slope | $C_{dl}$ (mF cm <sup>-2</sup> ) | ECSA (cm <sup>2</sup> ) | RF      |
|------------------------------------|-------|---------------------------------|-------------------------|---------|
| Bare NF                            | 4.2   | 2.1                             | 52.5                    | 52.5    |
| Co(OH) <sub>2</sub> @NF            | 4.78  | 2.39                            | 59.75                   | 59.75   |
| Co(OH) <sub>2</sub> /ZIF-67@NF     | 3.38  | 1.69                            | 42.25                   | 42.25   |
| Co <sub>3</sub> O <sub>4</sub> @NF | 15.67 | 7.835                           | 195.875                 | 195.875 |
| Co <sub>3</sub> S <sub>4</sub> @NF | 28.39 | 14.195                          | 354.875                 | 354.875 |
| RuO <sub>2</sub> @NF               | 23.25 | 11.625                          | 290.625                 | 290.625 |

**For the calculation of Turn Over Frequency (TOF):**

Active site calculation is important to calculate TOF. Co<sup>3+</sup> centres formed after oxidation of Co<sup>2+</sup> are thought to be the potential active sites. The number of electrons involved in this Co<sup>2+</sup>-Co<sup>3+</sup> redox couple is only one. Hence, if we can calculate the charge (Q) involved in the transformation of Co<sup>2+</sup> to Co<sup>3+</sup>, we can calculate the total number of electrons involved in practical application of the electrocatalyst by dividing the total charge involved (Q) by the charge of one electron. Since, there is an involvement of only one electron, assuming all Co<sup>3+</sup> centres to be active sites, we can assume the number of electrons involved to be equal to the total number of active sites in the electrocatalyst.

### Calculation of active sites:

Area under the oxidation peak of LSV curve of the redox couple  $\text{Co}^{2+}$ - $\text{Co}^{3+}$  of  $\text{Co}_3\text{O}_4@\text{NF}$  (Fig. S14) = 0.39509 mA V

$$Q = \frac{1}{v} \int_{E_1}^{E_2} i(E) dE$$

Hence,  $(v = \text{scan rate})$

$$= (0.39509 \text{ mA V}) / (0.002 \text{ V s}^{-1}) = 197.545 \text{ mA s} = 0.197545 \text{ C}$$

$$\text{Number of electrons involved} = \frac{0.197545 \text{ C}}{1.602 \times 10^{-19} \text{ C}} = 1.233 \times 10^{18}$$

Hence, number of active sites in  $\text{Co}_3\text{O}_4@\text{NF}$  =  $1.233 \times 10^{18}$

Similarly, number of active sites in  $\text{Co}_3\text{S}_4@\text{NF}$  was calculated and found to be =  $2.735 \times 10^{18}$

The TOF was calculated from the integrated OER LSV curves at a scan rate of  $2 \text{ mV s}^{-1}$  using the equation (9) and shown in Fig. S15.

**Table S7.** Number of active sites and TOF of the electrocatalysts.

| Electrocatalyst                   | No. of active sites    | Potential<br>(V vs. RHE) | TOF ( $\text{s}^{-1}$ ) |
|-----------------------------------|------------------------|--------------------------|-------------------------|
| $\text{Co}_3\text{O}_4@\text{NF}$ | $1.233 \times 10^{18}$ | 1.6                      | 0.064                   |
|                                   |                        | 1.76                     | 0.25                    |
| $\text{Co}_3\text{S}_4@\text{NF}$ | $2.735 \times 10^{18}$ | 1.6                      | 0.035                   |



1.76

0.093

**Table S8.** Comparison of electrocatalytic OER performance of the  $\text{Co}_3\text{O}_4@\text{NF}$  and  $\text{Co}_3\text{S}_4@\text{NF}$  electrodes with recently reported non-precious transition metal based electrocatalysts.

| Electrocatalyst                                | Electrolyte                   | j<br>(mA cm <sup>-2</sup> ) | $\eta$<br>(mV) | Ref.      |
|------------------------------------------------|-------------------------------|-----------------------------|----------------|-----------|
| $\text{Co}_3\text{O}_4@\text{NF}$              | 1 M KOH                       | 10                          | 270            | This work |
|                                                |                               | 20                          | 318            |           |
| $\text{Co}_3\text{S}_4@\text{NF}$              | 1 M KOH                       | 20                          | 260            | This work |
| $\text{Co}_3\text{S}_4@\text{rGO}$             | 0.5 M $\text{H}_2\text{SO}_4$ | 10                          | 350            | S4        |
| $\text{Co}_3\text{O}_4@\text{rGO}$             | 0.5 M $\text{H}_2\text{SO}_4$ | 10                          | 380            | S4        |
| $\text{CoS}_x/\text{Ni}_3\text{S}_2@\text{NF}$ | 1 M KOH                       | 20                          | 280            | S5        |
| $\text{FeCoNiP}@\text{NC}$                     | 1 M KOH                       | 10                          | 266            | S6        |
| Co-Fe oxyphosphide                             | 1 M KOH                       | 10                          | 280            | S7        |
| Ni-Fe urchin-like catalyst                     | 1 M KOH                       | 10                          | 292            | S8        |
|                                                |                               | 20                          | 318            |           |
|                                                |                               | 100                         | 374            |           |
| $\text{ZrNi-FeOOH}$                            | 1 M KOH                       | 10                          | 231            | S9        |
|                                                |                               | 100                         | 250            |           |
| $\text{Fe-Ni}_5\text{P}_4/\text{NiFeOH-350}$   | 1 M KOH                       | 10                          | 221            | S10       |
| $\text{Ni-Ru}@\text{Fe/C}@\text{CNT}$          | 1 M KOH                       | 10                          | 246            | S11       |
| $\text{Fe-MOF/Au-8/FF}$                        | Alkaline                      | 10                          | 320            | S12       |
| $\text{Co}@\text{BNPCFs-800}$                  | 1 M KOH                       | 10                          | 324            | S13       |
| $\text{Co/Mo}_2\text{C}@\text{C}$              | 1 M KOH                       | 10                          | 254            | S14       |

|                                   |                             |    |       |     |
|-----------------------------------|-----------------------------|----|-------|-----|
| CoMoNiPi                          | 1 M KOH                     | 10 | 272   | S15 |
| Co@CoMoOx- $\alpha$ -CrOOH        | 1 M KOH                     | 10 | 278   | S16 |
| Co-NCNT@NHC                       | 1 M KOH                     | 20 | 300   | S17 |
| Co@NC nanocage/HCF <sub>200</sub> | O <sub>2</sub> sat. 1 M KOH | 10 | 396   | S18 |
| Ni-Fe-S                           | 1 M KOH                     | 10 | 375.3 | S19 |
|                                   |                             | 50 | 450   |     |

**Table S9.** Tafel slope, overpotentials at current densities of  $-10 \text{ mA cm}^{-2}$  and  $-20 \text{ mA cm}^{-2}$  of the synthesized electrocatalysts for HER.

| Electrocatalyst                    | Tafel slope<br>( $\text{mV dec}^{-1}$ ) | $\eta@-10 \text{ mA cm}^{-2}$<br>( $\text{mV}$ ) | $\eta@-20 \text{ mA cm}^{-2}$<br>( $\text{mV}$ ) | Electrolyte |
|------------------------------------|-----------------------------------------|--------------------------------------------------|--------------------------------------------------|-------------|
| Bare NF                            | 200                                     | 253                                              | 298                                              | 1 M KOH     |
| Co(OH) <sub>2</sub> @NF            | 192                                     | 221                                              | 266                                              | 1 M KOH     |
| Co(OH) <sub>2</sub> /ZIF-67@NF     | 179                                     | 238                                              | 280                                              | 1 M KOH     |
| Co <sub>3</sub> O <sub>4</sub> @NF | 154                                     | 124                                              | 178                                              | 1 M KOH     |
| Co <sub>3</sub> S <sub>4</sub> @NF | 110                                     | 152                                              | 180                                              | 1 M KOH     |
| Pt/C@NF                            | 88                                      | 11                                               | 30                                               | 1 M KOH     |

**Table S10.** Nyquist plot data of synthesised materials in HER region at  $-0.3 \text{ V}$  (vs. RHE) potential.

| Electrocatalyst | $R_s$ ( $\Omega$ ) | $R_{ct}$ ( $\Omega$ ) | $R_T$ ( $\Omega$ ) |
|-----------------|--------------------|-----------------------|--------------------|
|-----------------|--------------------|-----------------------|--------------------|

|                                                     |       |        |        |
|-----------------------------------------------------|-------|--------|--------|
| Co <sub>3</sub> O <sub>4</sub> @NF before stability | 1.16  | 2.32   | 3.48   |
| Co <sub>3</sub> O <sub>4</sub> @NF after stability  | 1.56  | 1.03   | 2.59   |
| Co <sub>3</sub> S <sub>4</sub> @NF before stability | 1.16  | 1.41   | 2.57   |
| Co <sub>3</sub> S <sub>4</sub> @NF after stability  | 1.16  | 1.11   | 2.27   |
| Co(OH) <sub>2</sub> @NF                             | 1.402 | 1.89   | 3.292  |
| Co(OH) <sub>2</sub> /ZIF-67@NF                      | 1.129 | 13.989 | 14.619 |

**Table S11.** Comparison of electrocatalytic HER performance of the Co<sub>3</sub>O<sub>4</sub>@NF and Co<sub>3</sub>S<sub>4</sub>@NF electrodes with recently reported non-precious transition metal based electrocatalysts.

| Electrocatalyst                                      | Electrolyte                          | -j<br>(mA cm <sup>-2</sup> ) | $\eta$<br>(mV) | Ref.      |
|------------------------------------------------------|--------------------------------------|------------------------------|----------------|-----------|
| Co <sub>3</sub> O <sub>4</sub> @NF                   | 1 M KOH                              | 10                           | 124            | This work |
|                                                      |                                      | 20                           | 178            |           |
| Co <sub>3</sub> S <sub>4</sub> @NF                   | 1 M KOH                              | 10                           | 152            | This work |
|                                                      |                                      | 20                           | 180            |           |
| Co <sub>3</sub> S <sub>4</sub> @rGO                  | 0.5 M H <sub>2</sub> SO <sub>4</sub> | 10                           | 151            | S4        |
| Co <sub>3</sub> O <sub>4</sub> @rGO                  | 0.5 M H <sub>2</sub> SO <sub>4</sub> | 10                           | 234            | S4        |
| CoS <sub>x</sub> /Ni <sub>3</sub> S <sub>2</sub> @NF | 1 M KOH                              | 10                           | 204            | S5        |
| FeCoNiP@NC                                           | 1 M KOH                              | 10                           | 187            | S6        |
|                                                      | 0.5 M H <sub>2</sub> SO <sub>4</sub> | 10                           | 93             |           |
| Co-Fe oxyphosphide                                   | 1 M KOH                              | 10                           | 180            | S7        |
| Ni-Fe urchin-like catalyst                           | 1 M KOH                              | 10                           | 124            | S8        |

|                                                      |                             |     |       |     |
|------------------------------------------------------|-----------------------------|-----|-------|-----|
|                                                      |                             | 20  | 157   |     |
|                                                      |                             | 100 | 243   |     |
| ZrNi-FeOOH                                           | 1 M KOH                     | 10  | 150   | S9  |
|                                                      |                             | 100 | 273   |     |
| Fe-Ni <sub>5</sub> P <sub>4</sub> /NiFeOH-350        | 1 M KOH                     | 10  | 197   | S10 |
| Fe-MOF/Au-8/FF                                       | Alkaline                    | 10  | 130   | S12 |
| Co@BNPCFs-800                                        | 1 M KOH                     | 10  | 151.3 | S13 |
| Co-NCNT@NHC                                          | 1 M KOH                     | 10  | 180   | S17 |
| Co@NC nanocage/HCF <sub>200</sub>                    | N <sub>2</sub> sat. 1 M KOH | 10  | 261.4 | S18 |
| ZnCo <sub>2</sub> S <sub>4</sub> /CoZn <sub>13</sub> | Alkaline                    | 10  | 160   | S20 |
| NiFeCo-LDH/CF                                        | 1 M KOH                     | 10  | 151   | S21 |
| Zn <sub>1-x</sub> Fe <sub>x</sub> -LDH/Ni-foam       | 1 M KOH                     | 10  | 221   | S22 |

**Table S12.** Comparison of cell potential needed for overall water splitting with recently reported electrode materials.

| Electrode material (Cathode)        | Electrode material (Anode)          | j (mA cm <sup>-2</sup> ) | Cell potential (V) | Electrolyte                          | Ref. |
|-------------------------------------|-------------------------------------|--------------------------|--------------------|--------------------------------------|------|
| MoS <sub>2</sub> /NiFe-LDH          | MoS <sub>2</sub> /NiFe-LDH          | 10                       | 1.61               | 1 M KOH                              | S1   |
| Co(OH)F@CoFe-LDH                    | Co(OH)F@CoFe-LDH                    | 10                       | 1.58               | 1 M KOH                              | S2   |
| NiFeOP                              | NiFeOP                              | 10                       | 1.57               | 1 M KOH                              | S3   |
| Co <sub>3</sub> S <sub>4</sub> @rGO | Co <sub>3</sub> S <sub>4</sub> @rGO | 10                       | 1.82               | 0.5 M H <sub>2</sub> SO <sub>4</sub> | S4   |

|                                                      |                                                      |    |       |         |           |
|------------------------------------------------------|------------------------------------------------------|----|-------|---------|-----------|
| CoS <sub>x</sub> /Ni <sub>3</sub> S <sub>2</sub> @NF | CoS <sub>x</sub> /Ni <sub>3</sub> S <sub>2</sub> @NF | 10 | 1.572 | 1 M KOH | S5        |
|                                                      |                                                      | 50 | 1.863 |         |           |
| FeCoNiP@NC                                           | FeCoNiP@NC                                           | 10 | 1.73  | 1 M KOH | S6        |
| Zn <sub>1-x</sub> Fe <sub>x</sub> -                  | Zn <sub>1-x</sub> Fe <sub>x</sub> -                  |    |       |         |           |
| oxyselenide/Ni-                                      | oxyselenide/Ni-                                      | 10 | 1.62  | 1 M KOH | S22       |
| foam                                                 | foam                                                 |    |       |         |           |
|                                                      |                                                      | 10 | 1.63  |         |           |
| Co <sub>3</sub> O <sub>4</sub> @NF                   | Co <sub>3</sub> S <sub>4</sub> @NF                   | 20 | 1.72  | 1 M KOH | This work |
|                                                      |                                                      | 50 | 1.83  |         |           |
|                                                      |                                                      | 10 | 1.61  |         |           |
| Co <sub>3</sub> O <sub>4</sub> @NF                   | Co <sub>3</sub> O <sub>4</sub> @NF                   | 20 | 1.76  | 1 M KOH | This work |
|                                                      |                                                      | 50 | 1.88  |         |           |
|                                                      |                                                      | 10 | 1.63  |         |           |
| Co <sub>3</sub> S <sub>4</sub> @NF                   | Co <sub>3</sub> S <sub>4</sub> @NF                   | 20 | 1.80  | 1 M KOH | This work |
|                                                      |                                                      | 50 | 1.96  |         |           |

## References

- S1 X.-P. Li, L.-R. Zheng, S.-J. Liu, T. Ouyang, S. Ye, and Z.-Q. Liu, *Chin. Chem. Lett.*, 2022, **33**, 4761-4765.
- S2 M. Qin, Y. Wang, H. Zhang, M. Humayun, X. Xu, Y. Fu, M. K. Kadirov and C. Wang, *CrystEngComm*, 2022, **24**, 6018–6030.
- S3 Y. Xie, B. Zhao, K. Tang, W. Qin, C. Tan, J. Yao, Y. Li, L. Jiang, X. Wang, and G. Zou, *Chem. Eng. J.*, 2021, **409**, 128156–128156.
- S4 R. S. Kumar, S. C. Karthikeyan, S. Ramakrishnan, S. Vijayapradeep, A. R. Kim, J.-S. Kim and D. J. Yoo, *Chem. Eng. J.* **2023**, *451*, 138471.

- S5 S. Shit, S. Chhetri, W. Jang, N. C. Murmu, H. Koo, P. Samanta, and T. Kuila, *ACS Appl. Mater. Interfaces*, 2018, **10**, 27712–27722.
- S6 J. Sun, S. Li, Q. Zhang, and J. Guan, *Sustain. Energy Fuels*, 2020, **4**, 4531–4537.
- S7 P. Zhang, X. Lu, J. Nai, S.-Q. Zang, and W. David, *Adv. Sci.*, 2019, **6**, 1900576–1900576.
- S8 E. Hatami, A. Toghraei and G. B. Darband, *Int. J. Hydrog. Energy*, 2021, **46**, 9394–9405.
- S9 Y. Yan, J. Liu, S. Feng, S. Ding, L. Qiao, X. Zheng, and W. Cai, *J. Mater. Chem. A*, 2021, **9**, 26777–26787.
- S10 C.-F. Li, J.-W. Zhao, L.-J. Xie, J.-Q. Wu and G.-R. Li, *Appl. Catal.*, 2021, **291**, 119987.
- S11 T. Gao, X. Li, X. Chen, C. Zhou, Q. Yue, H. Yuan, and D. Xiao, *Chem. Eng. J.*, 2021, **424**, 130416–130416.
- S12 Y. Xu, M. Xie, L. Xianfa, F. Shao, S. Li, S. Li, Y. Xu, J. Chen, F.-G. Zeng and Y. J. Jiao, *Interface Sci.*, 2022, **626**, 426–434.
- S13 F. Guo, Z. Liu, J. Xiao, X. Zeng, C. Zhang, Y. Lin, P. Dong, T. Liu, Y. Zhang and M. Li, *Chem. Eng. J.*, 2022, **446**, 137111.
- S14 S. Yuan, M. Xia, Z. Liu, K. Wang, L. Xiang, G. Huang, J.-Y. Zhang, and N. Li, *Chem. Eng. J.*, 2022, **430**, 132697–132697.
- S15 R. Ramaraj, and K. Kim, *ACS Appl. Mater. Interfaces*, 2023, **15**, 16571–16583.
- S16 S. F. Lim, C.-L. Chiang, C.-K. Peng, W. Wu, Y.-C. Lin, Y.-R. Lin, C.-L. Chen and Y.-G. Lin, *Chem. Eng. J.*, 2022, **452**, 139715–139715.
- S17 Y. Zhuang, H. Cheng, C. Meng, B. Chen and H. Zhou, *J. Colloid Interface Sci.*, 2023, **643**, 162–173.
- S18 R. Zhu, X. Yu, W. Li, M. Li, X. Bo, and G. Gan, *J. Alloys Compd.*, 2023, **947**, 169488.

- S19 W. Xu, S. Zhao, J.-P. Zhang, X. Yang, Y.-X. Tang, Y.-W. Han, and Y. Shen, *Int. J. Hydrog. Energy*, 2023, **48**, 18315-18325.
- S20 D. Zhao, M. Dai, H. Liu, Z. Duan, X. Tan, and X. Wu, *J. Energy Chem.*, 2022, **69**, 292–300.
- S21 R. Hu, H. Jiang, J. Xian, S. Mi, L. Wei, G. Fang, J. Guo, S. Xu, Z. Liu, H. Jin, H. Yu, and J. Wan, *Nanomaterials*, 2022,**12**, 2416–2416.
- S22 G. Rajeshkhanna, S. Kandula, K. R. Shrestha, N. H. Kim and J. H. Lee, *Small*, 2018, **14**, 1803638.
